# Supplementary material
Source: ML conference proceedings conference paper supplement (https://openreview.net/forum?id=HnNgVPUiqx9)

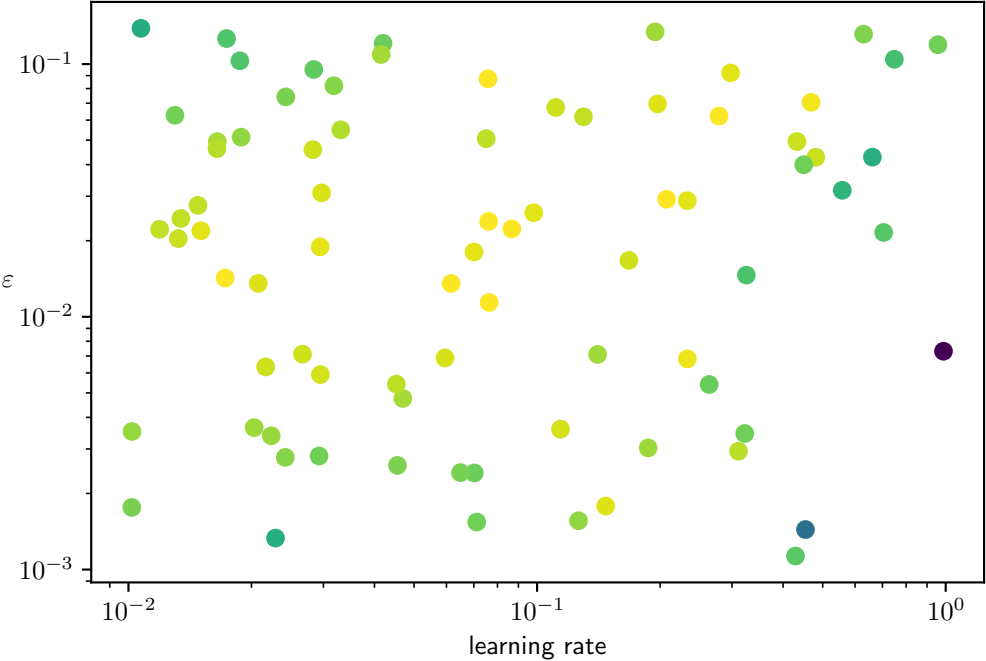

Supplement: supplementary_material [file attachment]

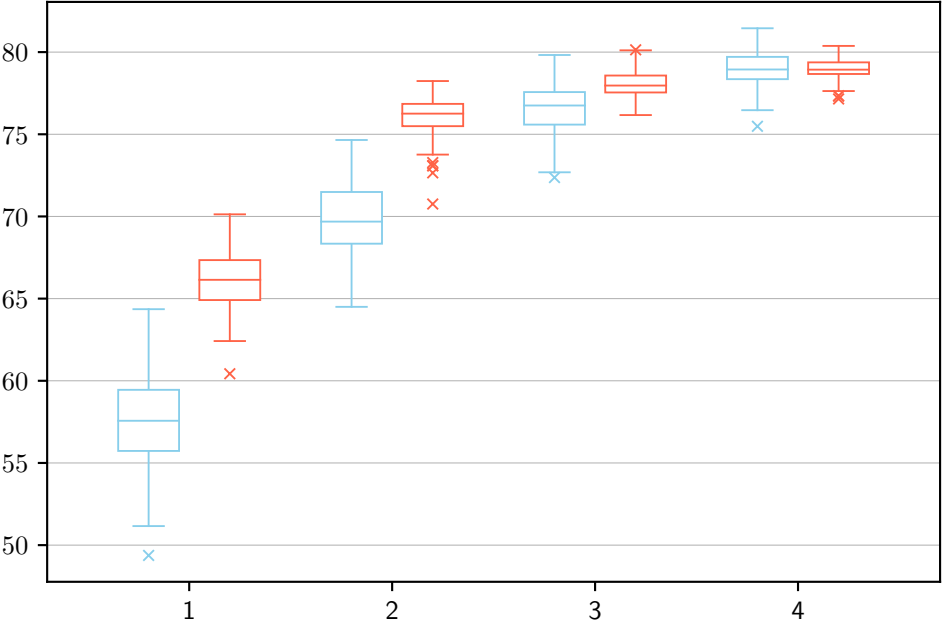

Supplement: supplementary_material [file attachment]

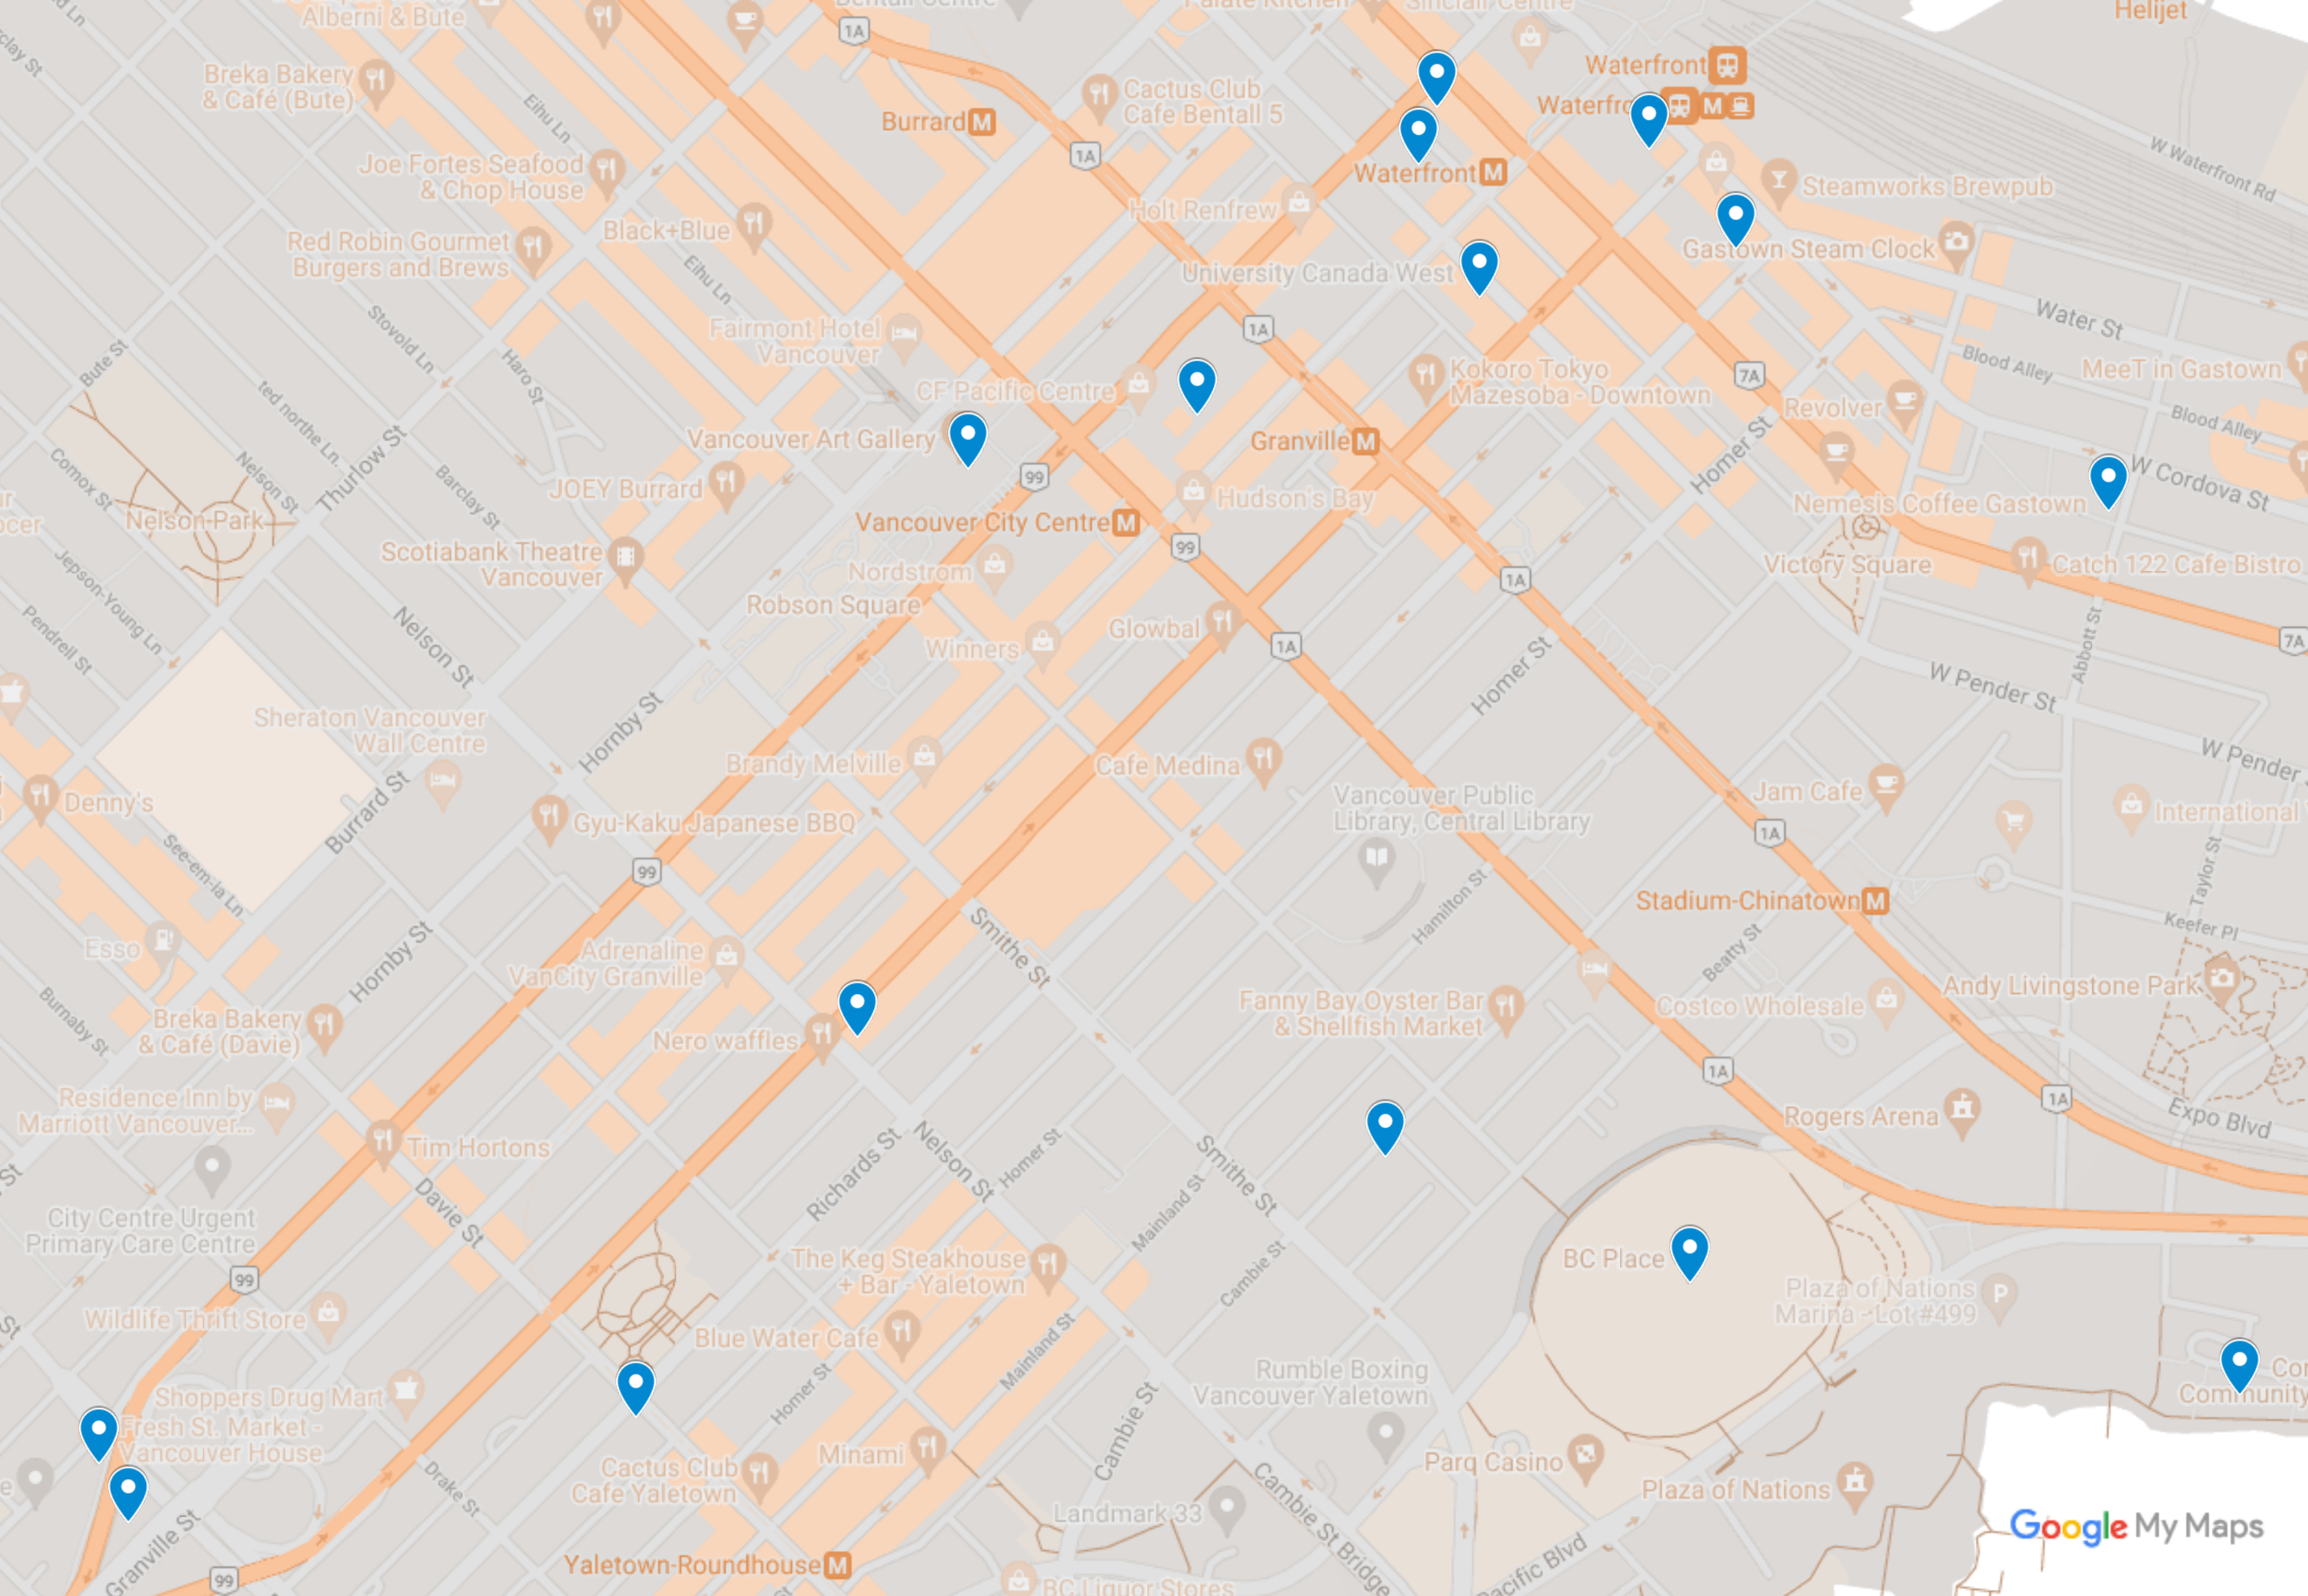

Supplement: supplementary_material [file attachment]

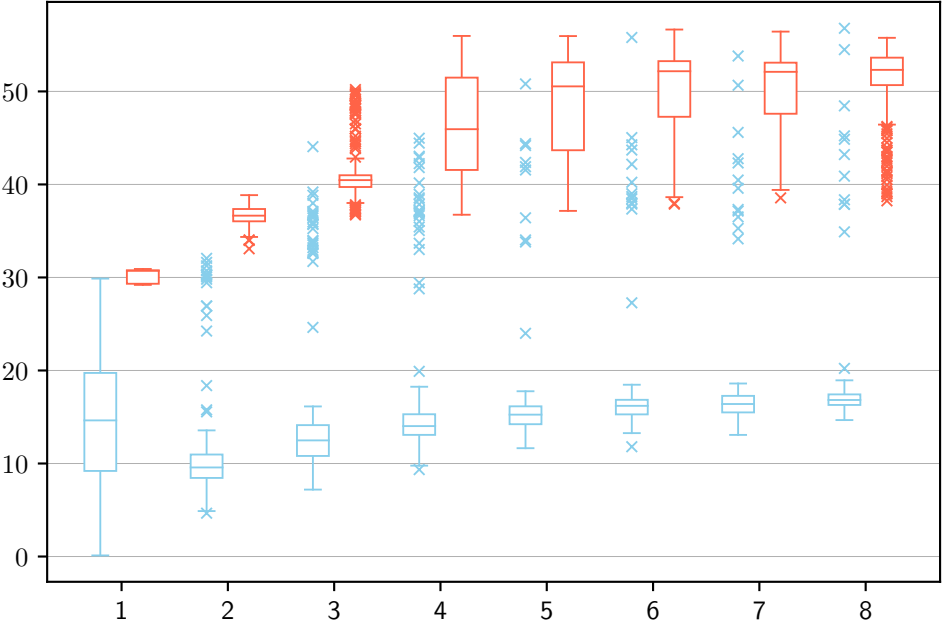

Supplement: supplementary_material [file attachment]

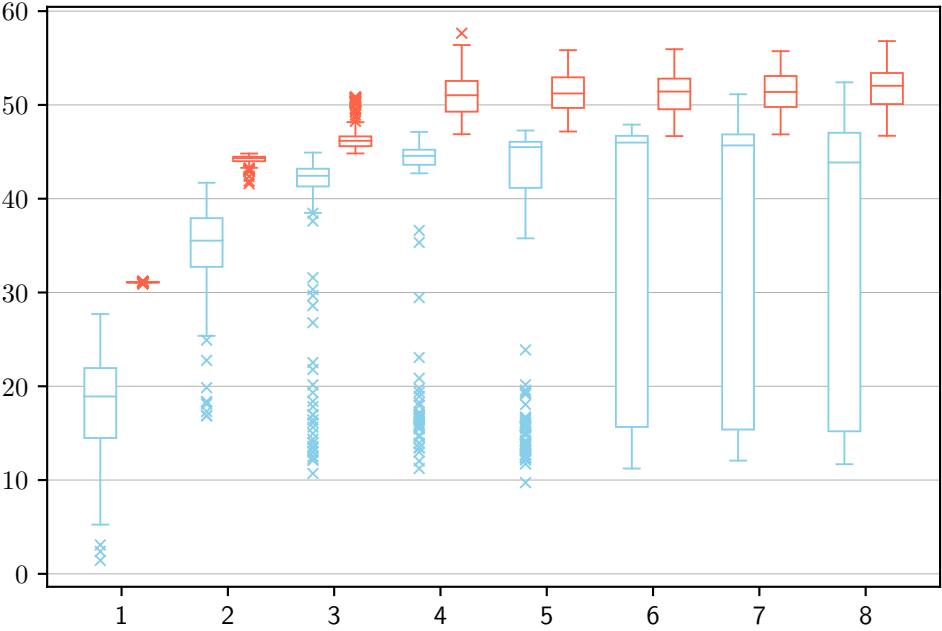

Supplement: supplementary_material [file attachment]

pwr=1

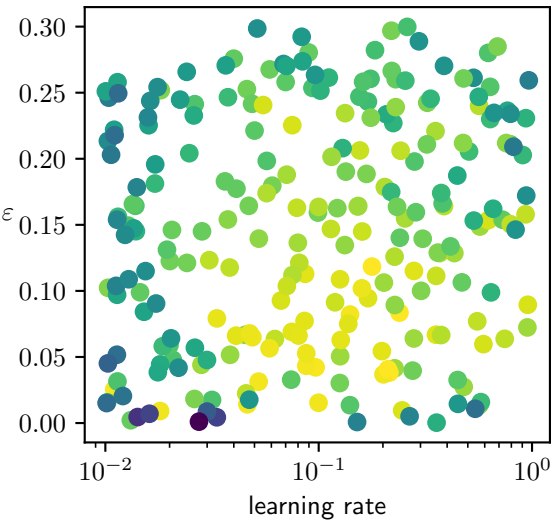

pwr=2

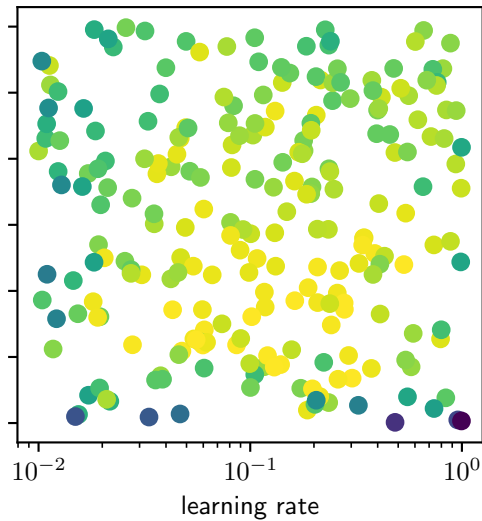

pwr=3

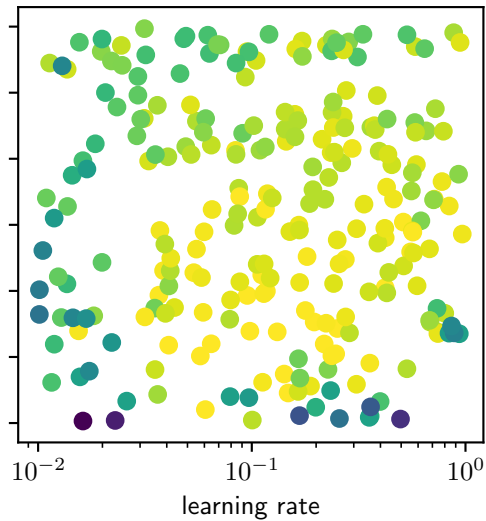

Supplement: supplementary_material [file attachment]

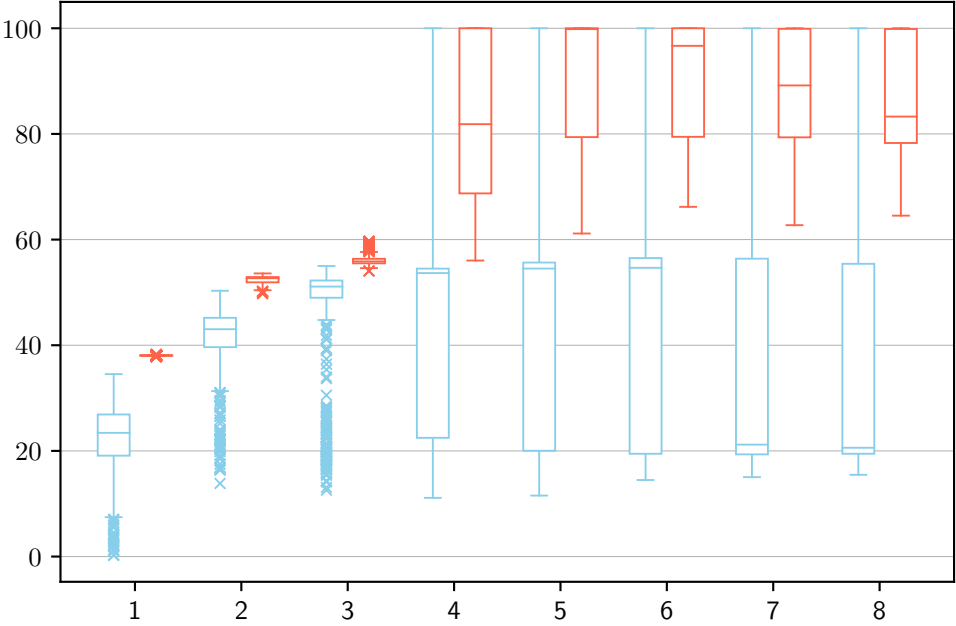

Supplement: supplementary_material [file attachment]

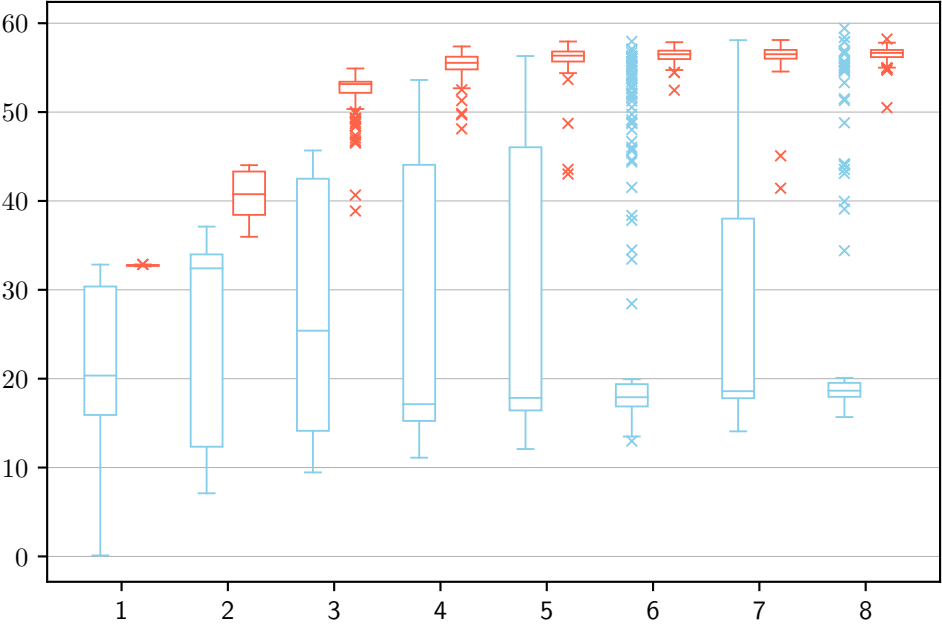

Supplement: supplementary_material [file attachment]
